# Supplementary material for: Phenological Shifts in a Warming World Affect Physiology and Life History in a Damselfly
Source: MDPI journal article supplement (doi:10.3390/insects13070622), 2022-07-12
Supplement: s1 [file s1]

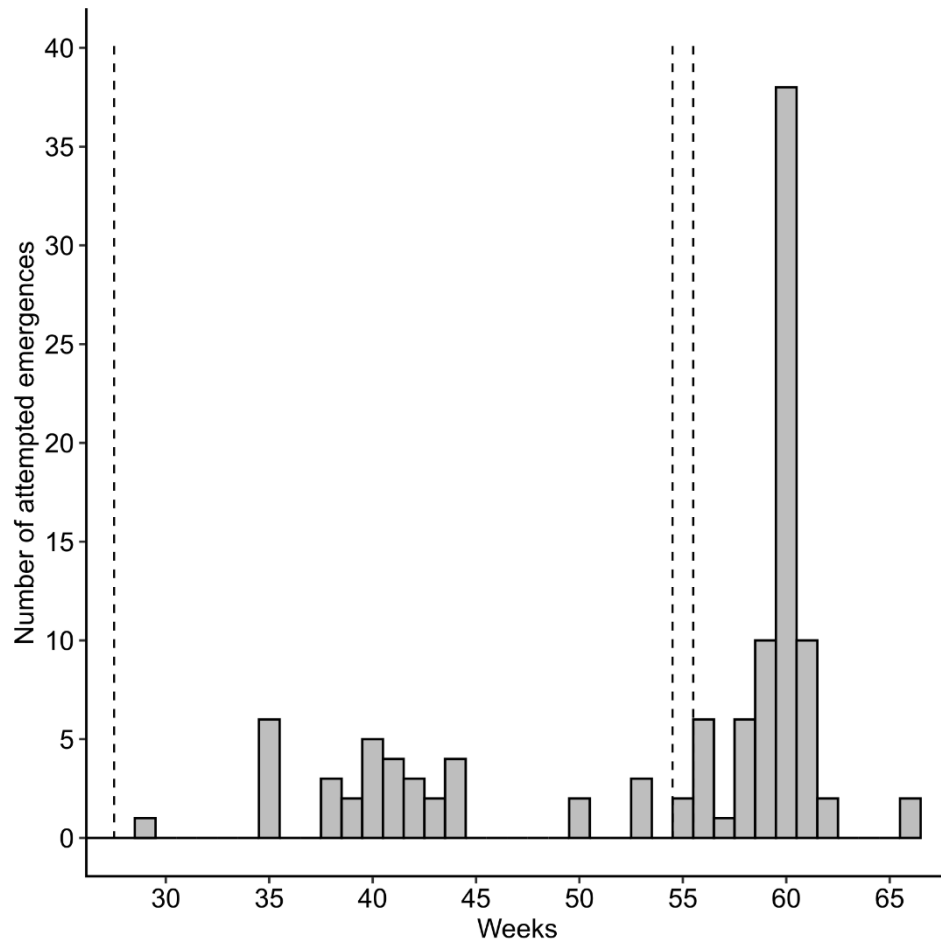

**Figure S1.** Number of attempted emergences per week in *Ischnura elegans*. No emergences happened during the first season (week 1-8), thus only second (week 28-55) and third (week 56-66) seasons were plotted. First dashed line mark the end of first winter. Second and third dashed lines represent beginning and end of second winter, respectively.

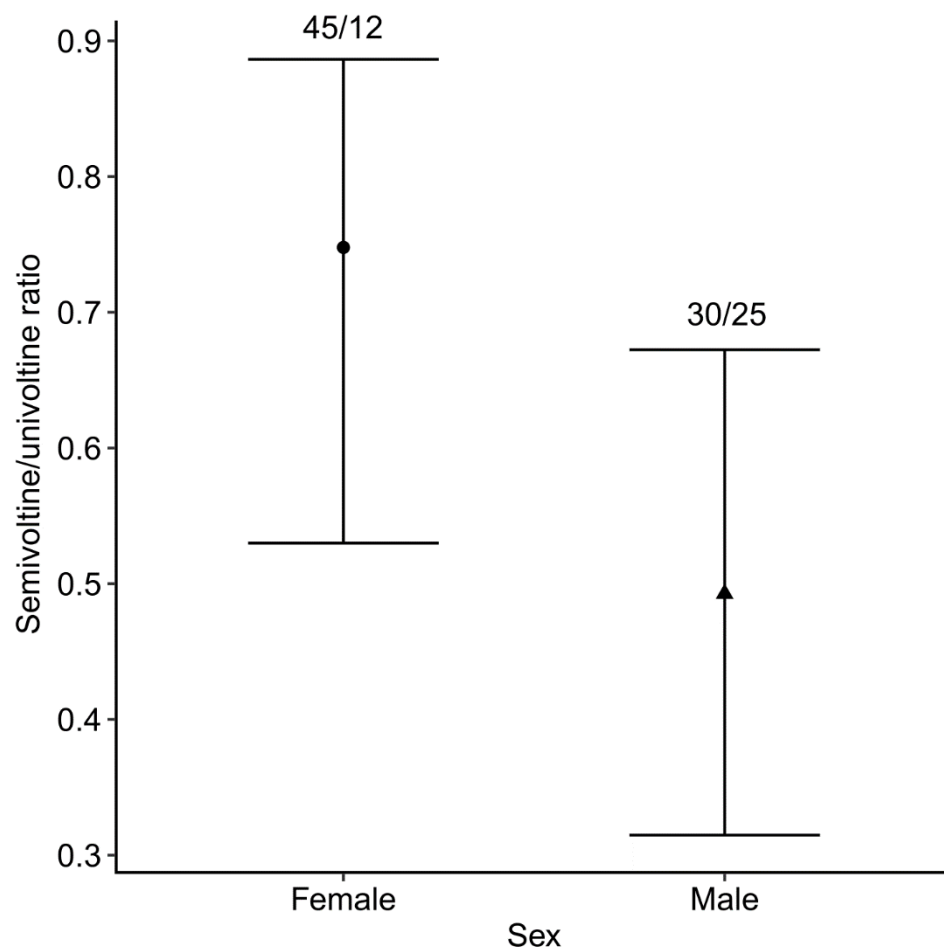

**Figure S2.** Semivoltine to univoltine ratio in emerging males and females. Error bars indicate estimated 95% CI. The numbers at the top of the error bars represent the number ratio of individuals within each group.

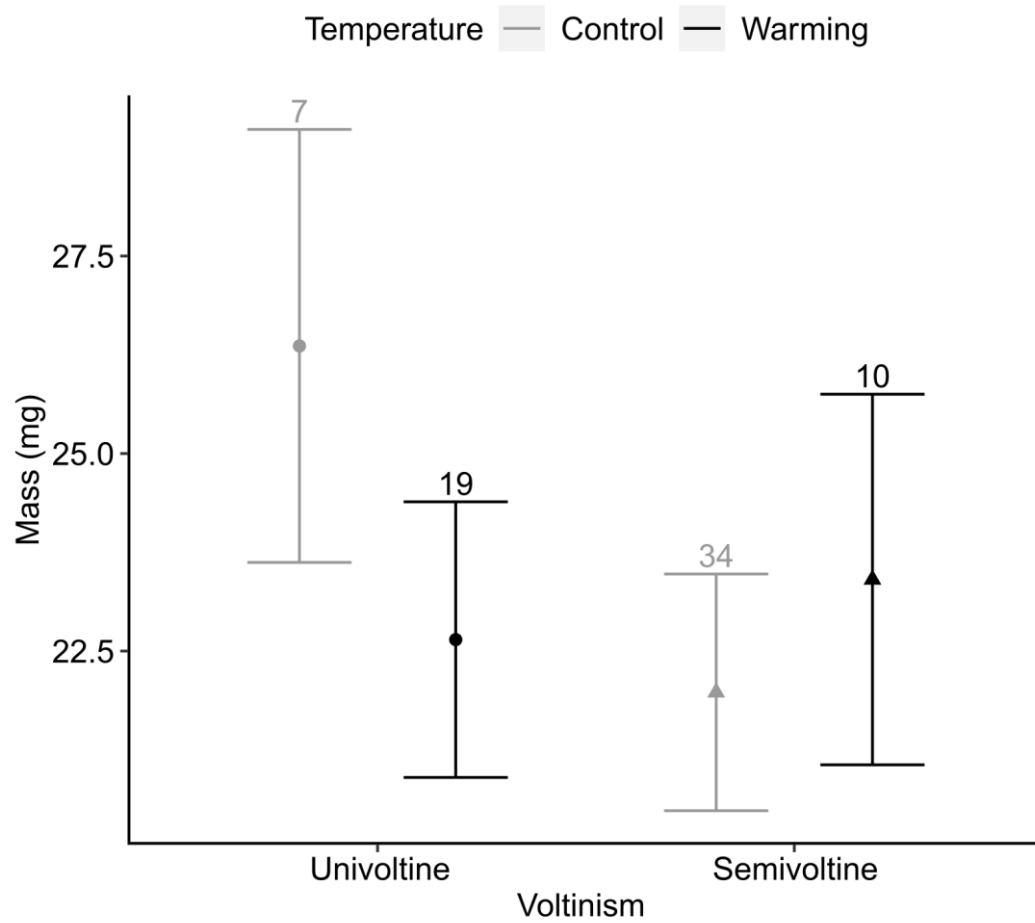

**Figure S3.** Mass at emergence in the control and warming temperature treatments, and across uni- and semivoltine individuals. Error bars indicate estimated 95% CI. The numbers at the top of the error bars represent the number of individuals within each group.

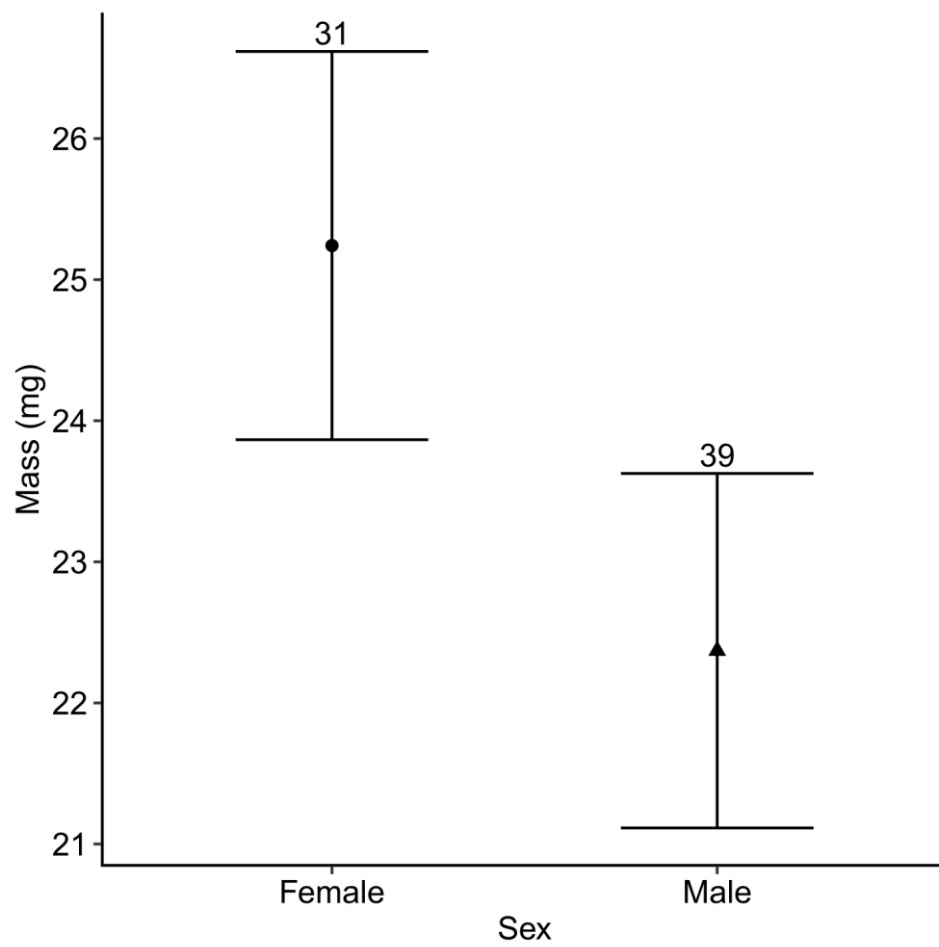

**Figure S4.** Female and male mass at emergence. Error bars indicate estimated 95% CI. The numbers at the top of the error bars represent the number of individuals within each group.

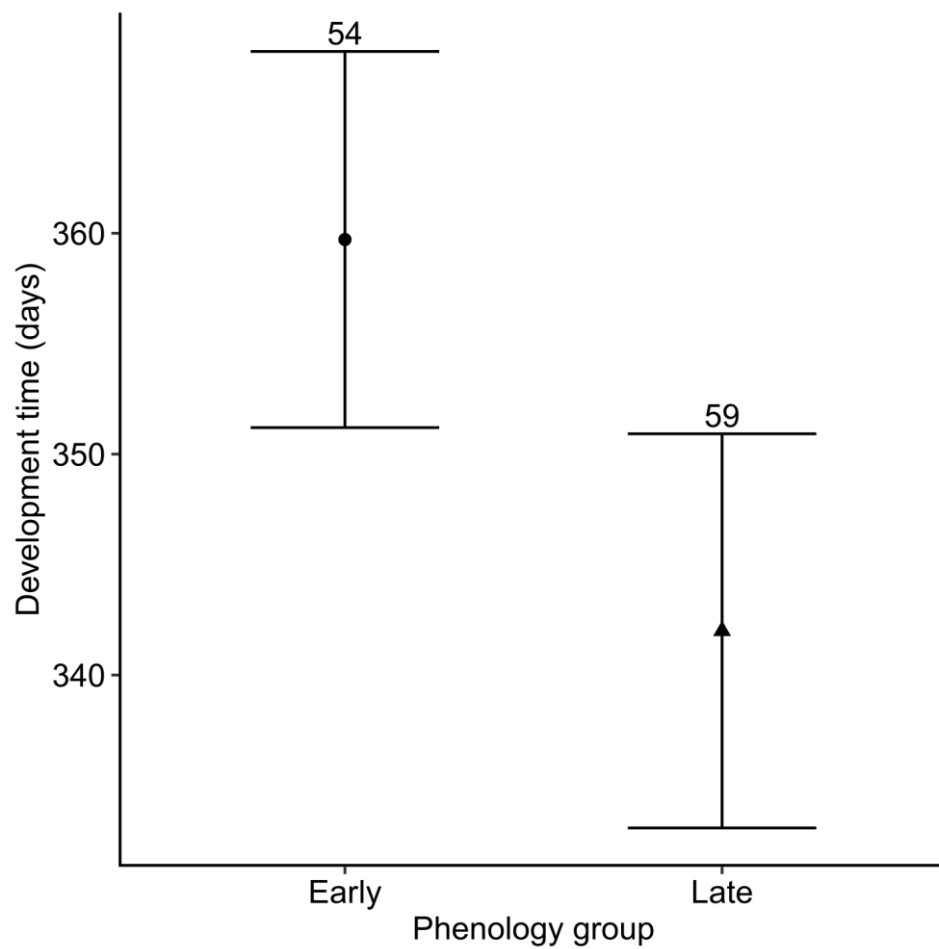

**Figure S5.** Development time for early and late hatchers. Error bars indicate estimated 95% CI. The numbers at the top of the error bars represent the number of individuals within each group.

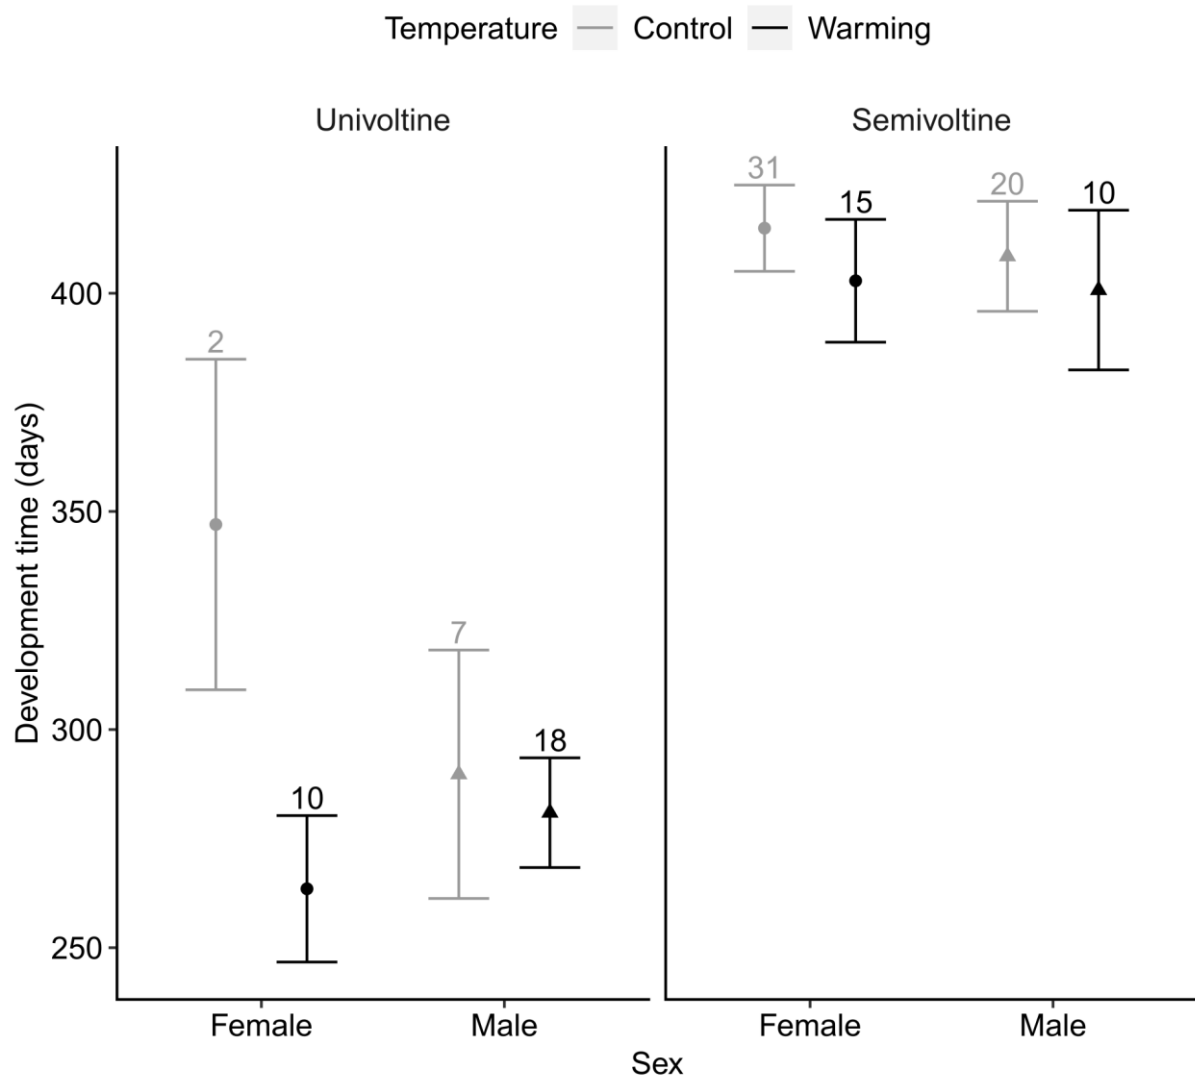

**Figure S6.** Development time in the control and warming temperature treatments for females and males, and across uni- and semivoltine individuals. Error bars indicate estimated 95% CI. The numbers at the top of the error bars represent the number of individuals within each group.

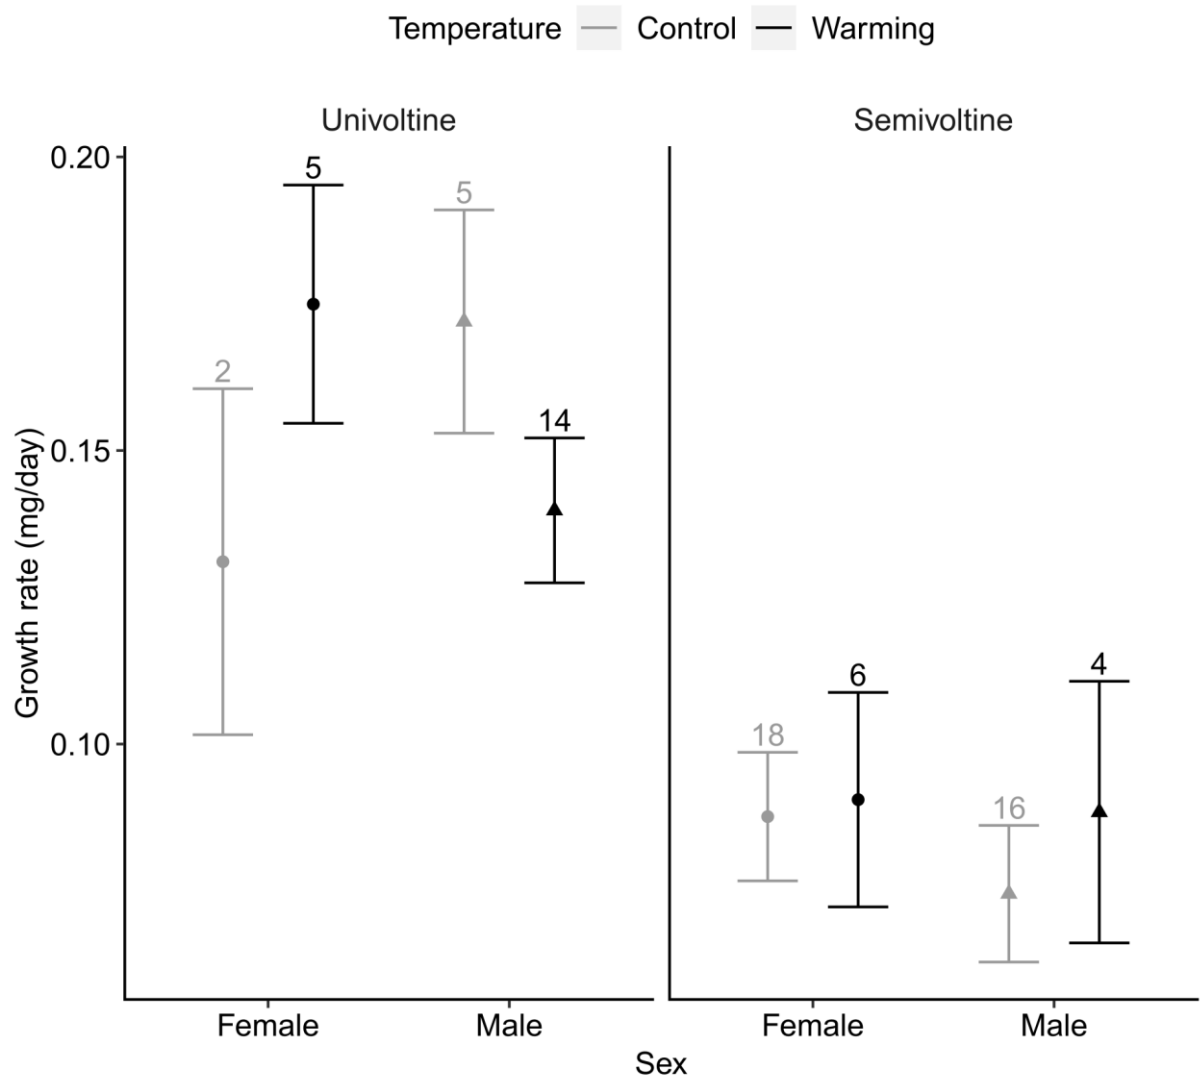

**Figure S7.** Growth rate in the control and warming temperature treatments for females and males, and across uni- and semivoltine individuals. Error bars indicate estimated 95% CI. The numbers at the top of the error bars represent the number of individuals within each group.

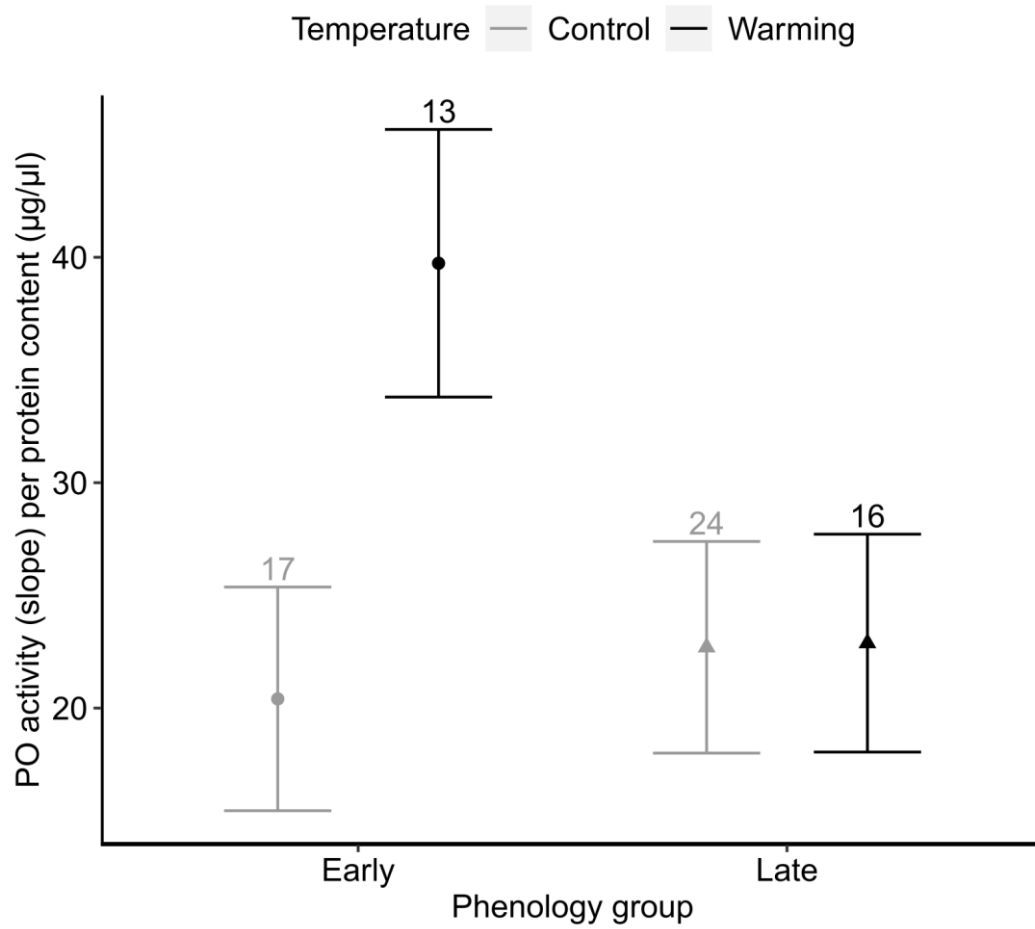

**Figure S8.** PO activity for early and late hatchers in the control and warming temperature treatments. Error bars indicate estimated 95% CI. The numbers at the top of the error bars represent the number of individuals within each group.

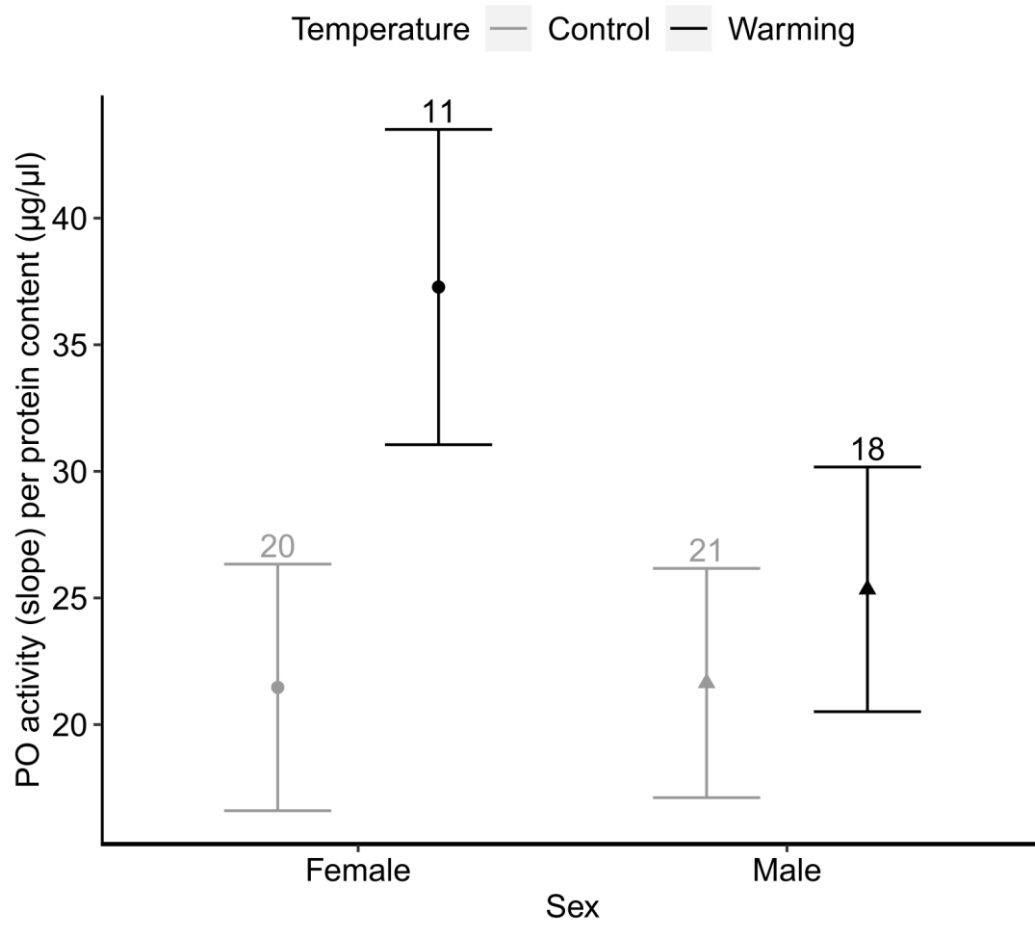

**Figure S9.** PO activity in the control and warming temperature treatments for females and males. Error bars indicate estimated 95% CI. The numbers at the top of the error bars represent the number of individuals within each group.

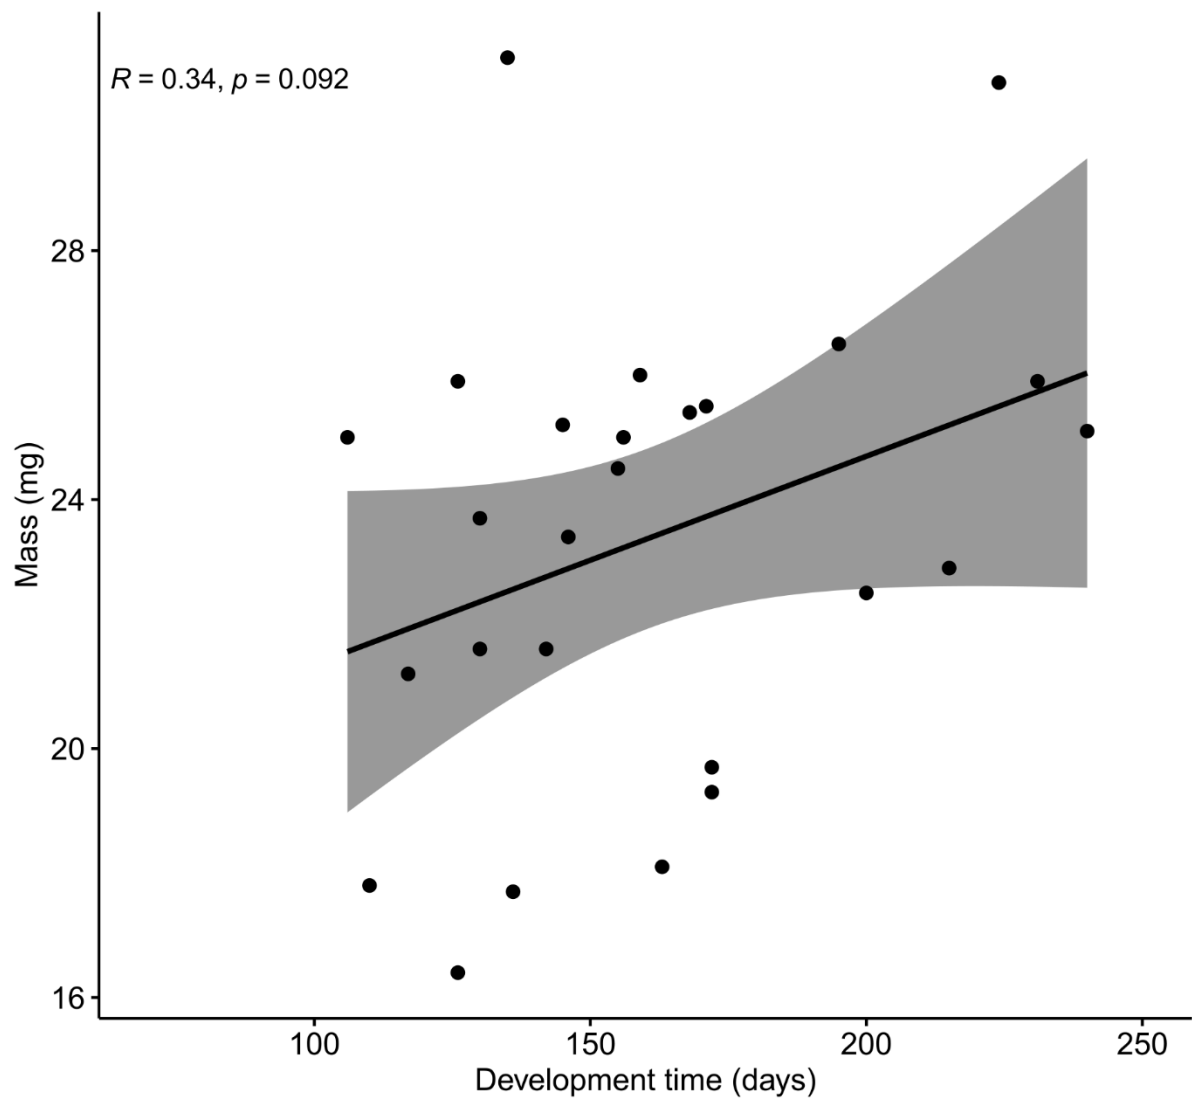

**Figure S10.** Correlation between mass at emergence and development time. Grey area represents estimated 95% CI.

**Table S1.** Survival until emergence and emergence success of *Ischnura elegans* across growth seasons. Season 1 lasted between 16 July 2019 and 05 Sept 2019 (equivalent of experimental 4 Aug 2019 - 23 Dec 2019). Season 2 lasted between 24 Jan 2020 and 24 July 2020 or (equivalent of experimental 8 May 2020 – 06 Nov 2020). Season 3 lasted between 7 Aug 2020 and 13 Nov 2020 or (equivalent of experimental 15 May 2020 – 6 Nov 2020). Only individuals which emerged successfully and survived to wet mass measurement (i.e., until next day after emergence) were used for mass, growth rate and PO analysis.

| Seasons                  | 1 | 2  | 3  |
|--------------------------|---|----|----|
| Survival until emergence | 0 | 37 | 76 |
| Emergence with success   | 0 | 35 | 57 |
